# Supplementary material
Source: Research Square preprint supplement (doi:10.21203/rs.3.rs-9429165/v1)
Supplement: Supplementary file 1 [file 0df3f43b4453a14a2a1c20ec.xlsx]

## Sheet: Sheet1
Table S1 List of wheat variety and drought tolerance index
Variety	Origin	The drought tolerance index
S7221	Hebei, China	0.443099
CH25	Henan, China	0.412786
IR20	Morocco	0.388375
IR214	Morocco	0.386707
IR77	Morocco	0.381138
IR35	Morocco	0.377735
LH5035	Shanxi, China	0.371883
IR55	Morocco	0.36955
IR36	Morocco	0.363224
TD6050	Hebei, China	0.36312
IR242	Morocco	0.361333
IR184	Morocco	0.35777
IR2	Morocco	0.352347
IR82	Morocco	0.352114
IR105	Morocco	0.349098
IR87	Morocco	0.348397
IR26	Morocco	0.344518
IR53	Morocco	0.33998
IR32	Morocco	0.337598
IR204	Morocco	0.329713
IR75	Morocco	0.328289
IR192	Morocco	0.325953
IR95	Morocco	0.325216
IR25	Morocco	0.325141
IR76	Morocco	0.324018
IR256	Australia	0.318456
IR47	Morocco	0.315989
IR43	Morocco	0.315437
IR19	Morocco	0.313498
IR137	Morocco	0.313188
XN2208	Shaanxi, China	0.312852
IR247	Morocco	0.311654
IR18	Morocco	0.310902
IR16	Morocco	0.30858
IR89	Morocco	0.308419
IR22	Morocco	0.303637
IR196	Morocco	0.303348
IR21	Morocco	0.301993
IR73	Morocco	0.298968
IR228	Morocco	0.296242
IR93	Morocco	0.295689
IR65	Morocco	0.290985
IR40	Morocco	0.290488
SM14	Hebei, China	0.284448
IR113	Morocco	0.282707
IR80	Morocco	0.28207
IR86	Morocco	0.27989
IR39	Morocco	0.278249
IR70	Morocco	0.277254
SM159	Shaanxi, China	0.276796
IR91	Morocco	0.27596
HH1	Hebei, China	0.275769
IR28	Morocco	0.274078
IR84	Morocco	0.273959
IR92	Morocco	0.273726
XY216	Shaanxi, China	0.273519
IR33	Morocco	0.272818
S512	Shaanxi, China	0.270138
IR193	Morocco	0.267544
BK8	Henan, China	0.267442
IR15	Morocco	0.266231
C6359	Shanxi, China	0.266089
IR79	Morocco	0.264453
IR237	Morocco	0.263313
IR74	Morocco	0.260708
IR5	Morocco	0.259244
IR197	Morocco	0.258996
JM47	Shanxi, China	0.25832
IR58	Morocco	0.257928
IR155	Morocco	0.257838
IR202	Morocco	0.257637
XN9871	Shaanxi, China	0.257571
IR63	Morocco	0.257427
IR148	Morocco	0.257035
JM92	Shanxi, China	0.254864
IR88	Morocco	0.253818
S139	Shaanxi, China	0.253025
IR50	Morocco	0.252594
IR233	Morocco	0.252337
ZM28	Henan, China	0.252198
IR102	Morocco	0.251322
IR211	Morocco	0.251183
IR7	Morocco	0.25071
IR224	Morocco	0.250642
IR17	Morocco	0.250039
YH805	Shanxi, China	0.249967
IR230	Morocco	0.24996
IR81	Morocco	0.249801
IR51	Morocco	0.24979
YM48	Henan, China	0.24919
ZM32	Henan, China	0.248109
IR231	Morocco	0.246964
IR27	Morocco	0.245334
IR221	Morocco	0.245102
IR236	Morocco	0.245031
IR34	Morocco	0.243998
IR31	Morocco	0.243735
IR254	Morocco	0.242706
IR255	Mexico	0.242573
IR220	Morocco	0.242346
IR103	Morocco	0.242146
ZM18	Henan, China	0.241757
IR135	Morocco	0.241654
IR100	Morocco	0.240756
IR60	Morocco	0.240665
IR37	Morocco	0.240554
IR110	Morocco	0.240117
IR198	Morocco	0.239555
IR24	Morocco	0.238167
ChineseSpring	Sichuan, China	0.237541
IR61	Morocco	0.237323
SL81	Shaanxi, China	0.237244
C6789	Shanxi, China	0.235078
IR1	Morocco	0.234216
IR243	Morocco	0.233088
JX97706	Henan, China	0.231436
IR3	Morocco	0.230367
IR4	Morocco	0.230258
XY6	Shaanxi, China	0.22976
ZL595	Henan, China	0.229703
IR104	Morocco	0.229629
IR66	Morocco	0.229229
IR94	Morocco	0.228703
YH139	Shanxi, China	0.228098
Z9694	Henan, China	0.227453
IR107	Morocco	0.226872
IR146	Morocco	0.226158
IR41	Morocco	0.222824
IR29	Morocco	0.222701
IR96	Morocco	0.222273
IR108	Morocco	0.221877
IR59	Morocco	0.220888
XN223	Shaanxi, China	0.220695
IR218	Morocco	0.220524
IR115	Morocco	0.220101
IR8	Morocco	0.219758
IR216	Morocco	0.218539
IR11	Morocco	0.217932
IR208	Morocco	0.217764
IR54	Morocco	0.217706
IR195	Morocco	0.217602
LK19	Shanxi, China	0.216595
ZX78	Henan, China	0.215689
JT170	Shanxi, China	0.214715
SY225	Shaanxi, China	0.214533
IR67	Morocco	0.213432
CW134	Shaanxi, China	0.213369
JM98	Shanxi, China	0.213368
IR205	Morocco	0.213203
IR44	Morocco	0.212401
IR252	Morocco	0.212385
IR210	Morocco	0.212149
IR251	Morocco	0.211736
LY8168	Shaanxi, China	0.211601
IR48	Morocco	0.211376
LK12	Shanxi, China	0.211095
LK5115	Shanxi, China	0.211031
IR191	Morocco	0.208853
XN889	Shaanxi, China	0.208566
IR117	Morocco	0.205701
IR219	Morocco	0.205511
C6878	Shanxi, China	0.203465
LY8155	Shaanxi, China	0.203464
LY8167	Shaanxi, China	0.202409
IR194	Morocco	0.201335
IR213	Morocco	0.200077
IR203	Morocco	0.19804
FM8	Henan, China	0.198003
IR200	Morocco	0.197347
IR68	Morocco	0.197305
IR99	Morocco	0.197116
IR97	Morocco	0.19701
HX10	Shanxi, China	0.195451
PY8161	Shaanxi, China	0.1939
IR109	Morocco	0.192003
LH5089	Shanxi, China	0.191353
JM91	Shanxi, China	0.191293
IR52	Morocco	0.191288
IR106	Morocco	0.191173
XY22	Shaanxi, China	0.18945
IR6	Morocco	0.189449
XY9	Shaanxi, China	0.187449
IR145	Morocco	0.187069
FDC1	Henan, China	0.186386
C4773	Shanxi, China	0.185486
IR112	Morocco	0.185426
IR118	Morocco	0.184402
IR10	Morocco	0.182914
IR116	Morocco	0.182422
IR9	Morocco	0.181737
IR111	Morocco	0.180659
IR226	Morocco	0.179736
IR143	Morocco	0.178934
IR98	Morocco	0.178841
IR240	Morocco	0.178198
IR209	Morocco	0.178098
YM4023	Henan, China	0.175018
IR201	Morocco	0.174034
IR150	Morocco	0.173808
IR171	Morocco	0.172205
ZM366	Henan, China	0.171135
IR182	Morocco	0.169472
IR125	Morocco	0.169417
LH6	Henan, China	0.168011
IR138	Morocco	0.167425
IR132	Morocco	0.166267
IR222	Morocco	0.165644
IR244	Morocco	0.165418
IR190	Morocco	0.163588
IR235	Morocco	0.16182
IR13	Morocco	0.159909
J411	Beijing, China	0.158959
IR223	Morocco	0.158023
WM05155	Jiangsu, China	0.157559
IR185	Morocco	0.156725
IR69	Morocco	0.156451
IR90	Morocco	0.154474
ZM58	Henan, China	0.154264
TM298	Henan, China	0.152994
IR130	Morocco	0.152957
YFM2	Jiangsu, China	0.152388
LM23	Henan, China	0.151844
IR127	Morocco	0.15083
LH21	Henan, China	0.150595
IR179	Morocco	0.149939
XM23	Henan, China	0.149554
LK18	Shanxi, China	0.148286
IR119	Morocco	0.147893
IR227	Morocco	0.146553
JM97	Shanxi, China	0.144424
IR189	Morocco	0.14064
SJZ8	Hebei, China	0.139641
IR152	Morocco	0.139437
IR178	Morocco	0.13908
IR159	Morocco	0.137529
IR169	Morocco	0.136382
LM29	Henan, China	0.133012
IR229	Morocco	0.13004
L33	Henan, China	0.129596
IR12	Morocco	0.126962
IR161	Morocco	0.125647
IR124	Morocco	0.125311
LY4	Gansu, China	0.124309
IR177	Morocco	0.122855
CW521	Shaanxi, China	0.122647
IR170	Morocco	0.118498
ZY12	Henan, China	0.11724
XK3210	Henan, China	0.116747
IR141	Morocco	0.116659
IR149	Morocco	0.104702
YN836	Shandong, China	0.102262
