# Supplementary material
Source: Research Square preprint supplement (doi:10.21203/rs.3.rs-9429165/v1)
Supplement: Supplementary file 2 [file 1c1e76d35200c314d45df897.xlsx]

## Sheet: Sheet1
Table S4 The average monthly rainfall at WG sites from June 2024 to May 2025.
Time	Average monthly rainfall (mm)
June 2024	17.1
July 2024	187.8
August 2024	46.5
September 2024	62.3
October 2024	28.9
November 2024	27
December 2024	0
January 2025	20
February 2025	3
March 2025	14
April 2025	3.2
May 2025	26.6
