# Supplementary material
Source: Research Square preprint supplement (doi:10.21203/rs.3.rs-9429165/v1)
Supplement: Supplementary file 4 [file 80703ee6dcdb86c918c54ede.xlsx]

## Sheet: Sheet1
Table S2 Primers used for quantitative real-time PCR (qRT-PCR).
Gene name	Gene ID	Forward primer Sequence	Reverse primer Sequence
26S rRNA	TraesCS3D02G417000	GCTGGCTCGTTCAACTGATG	GGACCAAGCGTTCTGATTACTC
PAL	TraesCS2D03G0459600	CACAAGTTGAAGCACCATCCT	CAAGCCTCGTGTTGTCCATC
CAD	TraesCS5A03G0533600	GGTTCAGAAGGACGAGGATGT	TTGGAGGTGAGCACGATGG
