# Supplementary material
Source: Research Square preprint supplement (doi:10.21203/rs.3.rs-9429165/v1)
Supplement: Supplementary file 5 [file a311cee248d0093738edde22.xlsx]

## Sheet: Sheet1
Table S3 Total of 33 biomarkers were identified by metabolic model-based analysis of microbiome and metabolomics.
No	Compound	Name	R2
C1	C00385	Xanthine	0.696
C2	C00257	Gluconic acid	0.097
C3	C00387	Guanosine	0.039
C4	C00881	Deoxycytidine	0.081
C5	C00159	Mannose	0.021
C6	C00249	Palmitic acid	0.078
C7	C06424	Myristic acid	0.584
C8	C01530	Stearic acid	0.001
C9	C00380	Cytosine	0.212
C10	C00153	Nicotinamide	0.543
C11	C00262	Hypoxanthine	0.121
C12	C00253	Nicotinic acid	0.106
C13	C00719	Betaine	0.003
C14	C00208	Maltose	0.134
C15	C00147	Adenine	0.09
C16	C02679	Dodecanoic acid	0.526
C17	C00242	Guanine	0.002
C18	C00106	Uracil	0.016
C19	C00042	Succinic acid	0.074
C20	C00559	Deoxyadenosine	0.558
C21	C00315	Spermidine	0.517
C22	C00089	Sucrose	0.002
C23	C00330	Deoxyguanosine	0.36
C24	C00212	Adenosine	0.424
C25	C00299	Uridine	0.492
C26	C00158	Citric acid	0.52
C27	C00455	Nicotinamide ribotide	0.056
C28	C00122	Fumaric acid	0.008
C29	C00214	Thymidine	0.178
C30	C00140	N-Acetyl-D-glucosamine	0.16
C31	C00526	Deoxyuridine	0.18
C32	C00712	Oleic acid	0.387
C33	C00294	Inosine	0.057
