# Supplementary material
Source: Research Square preprint supplement (doi:10.21203/rs.3.rs-9429165/v1)
Supplement: Supplementary file 6 [file e17f249e0899d6c0c4d5b6c4.xlsx]

## Sheet: Sheet1
Table S3 The bacterial composition of synthetic microbial communities (SynComs).
No	Kingdom	Phylum	Class	Order	Family	Genus
SynCom A-1	Bacteria	Bacillota	Bacilli	Bacillales	Paenibacillaceae	Paenibacillus
SynCom A-2	Bacteria	Bacillota	Bacilli	Bacillales	Paenibacillaceae	Paenibacillus
SynCom A-3	Bacteria	Bacillota	Bacilli	Bacillales	Paenibacillaceae	Paenibacillus
SynCom B-1	Bacteria	Bacillota	Bacilli	Bacillales	Bacillaceae	Bacillus
SynCom B-2	Bacteria	Bacillota	Bacilli	Bacillales	Bacillaceae	Bacillus
SynCom B-3	Bacteria	Bacillota	Bacilli	Bacillales	Bacillaceae	Bacillus
SynCom B-4	Bacteria	Bacillota	Bacilli	Bacillales	Bacillaceae	Bacillus
SynCom B-5	Bacteria	Bacillota	Bacilli	Bacillales	Bacillaceae	Bacillus
SynCom B-6	Bacteria	Bacillota	Bacilli	Bacillales	Bacillaceae	Bacillus
SynCom B-7	Bacteria	Bacillota	Bacilli	Bacillales	Bacillaceae	Bacillus
SynCom B-8	Bacteria	Bacillota	Bacilli	Bacillales	Bacillaceae	Bacillus
SynCom B-9	Bacteria	Bacillota	Bacilli	Bacillales	Bacillaceae	Bacillus
SynCom B-10	Bacteria	Bacillota	Bacilli	Bacillales	Bacillaceae	Bacillus
SynCom B-11	Bacteria	Bacillota	Bacilli	Bacillales	Bacillaceae	Bacillus
SynCom B-12	Bacteria	Bacillota	Bacilli	Bacillales	Bacillaceae	Bacillus
SynCom B-13	Bacteria	Bacillota	Bacilli	Bacillales	Bacillaceae	Bacillus
SynCom B-14	Bacteria	Bacillota	Bacilli	Bacillales	Bacillaceae	Fictibacillus
SynCom B-15	Bacteria	Actinomycetota	Actinomycetes	Micrococcales	Microbacteriaceae	Microbacterium
SynCom B-16	Bacteria	Actinomycetota	Actinomycetes	Micrococcales	Microbacteriaceae	Microbacterium
SynCom B-17	Bacteria	Bacillota	Bacilli	Bacillales	Paenibacillaceae	Paenibacillus
SynCom B-18	Bacteria	Bacillota	Bacilli	Bacillales	Paenibacillaceae	Paenibacillus
SynCom B-19	Bacteria	Bacillota	Bacilli	Bacillales	Paenibacillaceae	Paenibacillus
SynCom B-20	Bacteria	Bacillota	Bacilli	Bacillales	Paenibacillaceae	Paenibacillus
SynCom B-21	Bacteria	Bacillota	Bacilli	Bacillales	Paenibacillaceae	Paenibacillus
SynCom B-22	Bacteria	Pseudomonadota	Gammaproteobacteria	Enterobacterales	Erwiniaceae	Pantoea
SynCom B-23	Bacteria	Actinomycetota	Actinomycetes	Micrococcales	Micrococcaceae	Pseudarthrobacter
SynCom B-24	Bacteria	Actinomycetota	Actinomycetes	Micrococcales	Micrococcaceae	Pseudarthrobacter
SynCom B-25	Bacteria	Actinomycetota	Actinomycetes	Micrococcales	Micrococcaceae	Pseudarthrobacter
SynCom B-26	Bacteria	Pseudomonadota	Gammaproteobacteria	Pseudomonadales	Pseudomonadaceae	Pseudomonas
SynCom B-27	Bacteria	Pseudomonadota	Betaproteobacteria	Burkholderiales	Burkholderiaceae	Ralstonia
SynCom C-1	Bacteria	Pseudomonadota	Gammaproteobacteria	Enterobacterales	Enterobacteriaceae	Enterobacter
SynCom C-2	Bacteria	Pseudomonadota	Gammaproteobacteria	Enterobacterales	Enterobacteriaceae	Enterobacter
SynCom C-3	Bacteria	Pseudomonadota	Gammaproteobacteria	Enterobacterales	Enterobacteriaceae	Enterobacter
SynCom D-1	Bacteria	Bacillota	Bacilli	Bacillales	Bacillaceae	Bacillus
SynCom D-2	Bacteria	Bacillota	Bacilli	Bacillales	Bacillaceae	Bacillus
SynCom D-3	Bacteria	Bacillota	Bacilli	Bacillales	Bacillaceae	Bacillus
SynCom D-4	Bacteria	Bacillota	Bacilli	Bacillales	Bacillaceae	Bacillus
SynCom D-5	Bacteria	Bacillota	Bacilli	Bacillales	Bacillaceae	Bacillus
SynCom D-6	Bacteria	Bacillota	Bacilli	Bacillales	Bacillaceae	Bacillus
SynCom D-7	Bacteria	Bacillota	Bacilli	Bacillales	Bacillaceae	Bacillus
SynCom D-8	Bacteria	Bacillota	Bacilli	Bacillales	Bacillaceae	Bacillus
SynCom D-9	Bacteria	Bacillota	Bacilli	Bacillales	Bacillaceae	Bacillus
SynCom D-10	Bacteria	Bacillota	Bacilli	Bacillales	Bacillaceae	Bacillus
SynCom D-11	Bacteria	Bacillota	Bacilli	Bacillales	Bacillaceae	Bacillus
SynCom D-12	Bacteria	Bacillota	Bacilli	Bacillales	Bacillaceae	Bacillus
SynCom D-13	Bacteria	Bacillota	Bacilli	Bacillales	Bacillaceae	Bacillus
SynCom D-14	Bacteria	Bacillota	Bacilli	Bacillales	Bacillaceae	Bacillus
SynCom D-15	Bacteria	Bacillota	Bacilli	Bacillales	Bacillaceae	Bacillus
SynCom D-16	Bacteria	Bacillota	Bacilli	Bacillales	Bacillaceae	Fictibacillus
SynCom D-17	Bacteria	Bacillota	Bacilli	Bacillales	Bacillaceae	Fictibacillus
SynCom D-18	Bacteria	Actinomycetota	Actinomycetes	Micrococcales	Microbacteriaceae	Microbacterium
SynCom D-19	Bacteria	Actinomycetota	Actinomycetes	Micrococcales	Microbacteriaceae	Microbacterium
SynCom D-20	Bacteria	Actinomycetota	Actinomycetes	Micrococcales	Microbacteriaceae	Microbacterium
SynCom D-21	Bacteria	Pseudomonadota	Gammaproteobacteria	Enterobacterales	Erwiniaceae	Pantoea
SynCom D-22	Bacteria	Pseudomonadota	Gammaproteobacteria	Enterobacterales	Erwiniaceae	Pantoea
SynCom D-23	Bacteria	Actinomycetota	Actinomycetes	Micrococcales	Micrococcaceae	Pseudarthrobacter
SynCom D-24	Bacteria	Actinomycetota	Actinomycetes	Micrococcales	Micrococcaceae	Pseudarthrobacter
SynCom D-25	Bacteria	Actinomycetota	Actinomycetes	Micrococcales	Micrococcaceae	Pseudarthrobacter
SynCom D-26	Bacteria	Pseudomonadota	Gammaproteobacteria	Pseudomonadales	Pseudomonadaceae	Pseudomonas
SynCom D-27	Bacteria	Pseudomonadota	Betaproteobacteria	Burkholderiales	Burkholderiaceae	Ralstonia
